# Supplementary material for: Learning through collegial conversations - a qualitative study of physicians’ professional development
Source: Research Square preprint supplement (doi:10.21203/rs.3.rs-6155737/v1), 2025-05-12
Supplement: Supplementary file 1 [file 9ced5b90721a1de1d3380314.docx]

Interview guide:

Background questions

- Tell me about your work, what you do, and what you enjoy in doing it?
- What are your main types of working tasks?

Learning

- What do you do when you need more knowledge, exemplify?
- How does your work environment contribute to your learning of new knowledge?
- What aspects hinder your learning?
- What aspects facilitate your learning?
- What role do colleagues play in your learning?
- When and where do you learn from colleagues?
- When and where do colleagues learn from you?

Rounding up

- Is there anything you would like to add?
